# Supplementary material for: Exploring Sex Differences of Beta-Blockers in the Treatment of Hypertension: A Systematic Review and Meta-Analysis
Source: MDPI journal article supplement (doi:10.3390/biomedicines11051494), 2023-05-22
Supplement: s1 [file s1]

**Table S1** Literature search: strategy for PubMed (NCBI) and Embase (Ovid) databases

| Search PubMed                                                                                                                                                                                                                                                                                                                                                                                                                                                                                                                                                                                                                                                                                                                                                                                                                                       | Search Embase                                                                                                                                                                                                                                                                                                                                         |
|-----------------------------------------------------------------------------------------------------------------------------------------------------------------------------------------------------------------------------------------------------------------------------------------------------------------------------------------------------------------------------------------------------------------------------------------------------------------------------------------------------------------------------------------------------------------------------------------------------------------------------------------------------------------------------------------------------------------------------------------------------------------------------------------------------------------------------------------------------|-------------------------------------------------------------------------------------------------------------------------------------------------------------------------------------------------------------------------------------------------------------------------------------------------------------------------------------------------------|
| <p><b><u>Component 1: Antihypertensive medication:</u></b> "diuretics"[Mesh] OR "adrenergic beta-antagonists"[Mesh] OR "beta blockers" [Title/Abstract] OR "Antihypertensive agents"[Mesh] OR "blood pressure lowering therapy" [Title/Abstract] OR "antihypertensive medication" [Title/Abstract] OR "antihypertensive therapy" [Title/Abstract] OR "angiotensin-converting enzyme inhibitors"[Mesh] OR "ACE inhibitors" [Title/Abstract] OR "Angiotensin receptor antagonists"[Mesh] OR "angiotensin receptor blockers" [Title/Abstract] OR "sympatholytics"[Mesh]OR "Calcium Channel Blockers"[Mesh]</p>                                                                                                                                                                                                                                         | <p><b><u>Component 1: Antihypertensive medication</u></b></p> <p>exp diuretic agent/ or exp beta adrenergic receptor blocking agent/ or exp adrenergic receptor blocking agent/ or exp antihypertensive agent/ or exp dipeptidyl carboxypeptidase inhibitor/ or exp angiotensin receptor antagonist/ or exp calcium channel blocking agent.ti,ab.</p> |
| <p><b><u>Component 2: Cardiac geometry:</u></b> "ventricular remodeling"[Mesh] OR "ventricular remodeling" [Title/Abstract] OR "cardiac remodeling" [Title/Abstract] OR "cardiac adaptation" [Title/Abstract] OR "LV geometry" [Title/Abstract] OR "left ventricular geometry" [Title/Abstract] OR "cardiac geometry" [Title/Abstract] OR "cardiac dimension" [Title/Abstract] OR "left ventricle remodeling "[Title/Abstract] OR "Hypertrophy, Left Ventricular "[Mesh] OR "left ventricular hypertrophy" [Title/Abstract] OR "echocardiography"[Mesh] OR Echocardiography [Title/Abstract] OR "left ventricular mass" [Title/Abstract] OR "left ventricular mass index" [Title/Abstract] OR "relative wall thickness" [Title/Abstract] OR "concentric cardiac remodeling" [Title/Abstract] OR "eccentric cardiac remodeling" [Title/Abstract]</p> | <p><b><u>Component 2: Cardiac geometry</u></b></p> <p>exp heart ventricle remodeling/ or (ventricular remodeling or cardiac remodeling or cardiac adaptation or LV geometry or left ventricular remodeling or cardiac geometry or cardiac dimension).ti,ab. or exp echocardiography/ or echocardiography.ti,ab.</p>                                   |
| <p><b><u>Component 3: Heart failure:</u></b> "Heart Failure"[Mesh] OR "Heart Failure, Systolic "[Mesh]</p>                                                                                                                                                                                                                                                                                                                                                                                                                                                                                                                                                                                                                                                                                                                                          | <p><b><u>Component 3: Heart failure</u></b></p> <p>exp heart failure.ti,ab.</p>                                                                                                                                                                                                                                                                       |
| <p><b><u>Component 4: Diastolic dysfunction:</u></b> "heart failure, diastolic"[Mesh] OR "diastolic dysfunction" [Title/Abstract]</p>                                                                                                                                                                                                                                                                                                                                                                                                                                                                                                                                                                                                                                                                                                               | <p><b><u>Component 4: Diastolic dysfunction</u></b></p> <p>exp diastolic dysfunction/ or diastolic function.ti,ab.</p>                                                                                                                                                                                                                                |
| <p><b><u>Component 5: Myocardial infarction:</u></b> "myocardial infarction" [Mesh] OR "myocardial infarction" [Title/Abstract] OR "acute myocardial infarction" [Title/Abstract] OR "heart attack" [Title/Abstract]</p>                                                                                                                                                                                                                                                                                                                                                                                                                                                                                                                                                                                                                            | <p><b><u>Component 5: Myocardial infarction</u></b></p> <p>exp heart infarction.ti,ab.</p>                                                                                                                                                                                                                                                            |

**Component 6: CVA:** Stroke [Mesh] OR “cerebrovascular accident” [Title/Abstract] OR **Component 6: CVA**  
“acute cerebrovascular accident” [Title/Abstract] OR “acute cerebrovascular insult” exp cerebrovascular accident.ti,ab.  
[Title/Abstract]

---

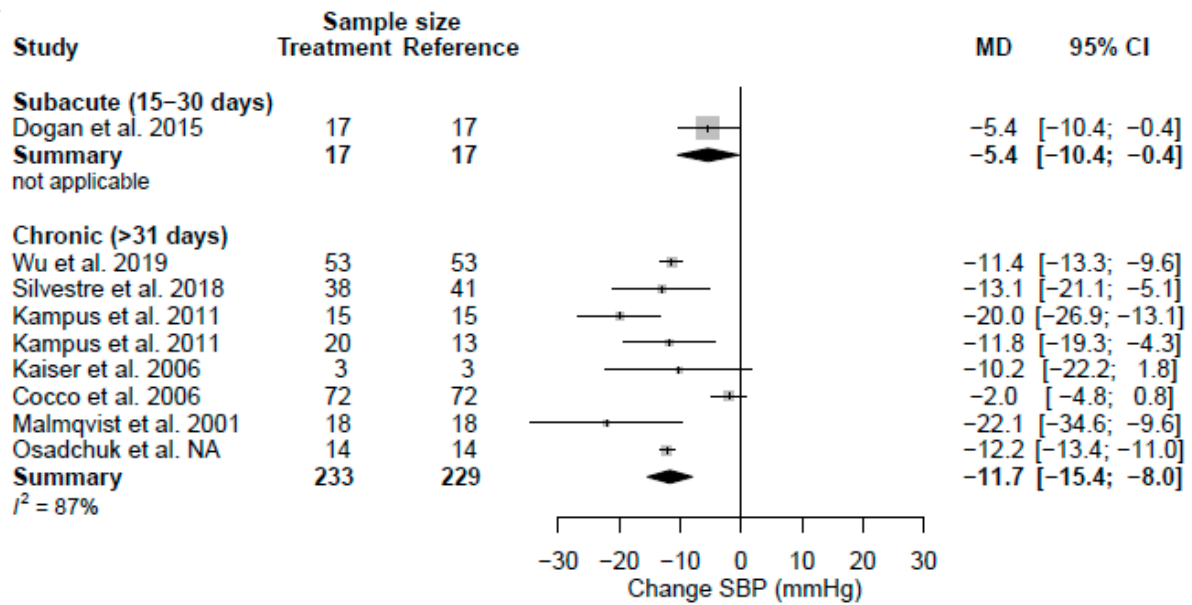

**Figure S1** Forest plot of systolic blood pressure (SBP) change in mmHg after sub-acute and chronic beta-blocker use compared to baseline for females. MD = mean difference.

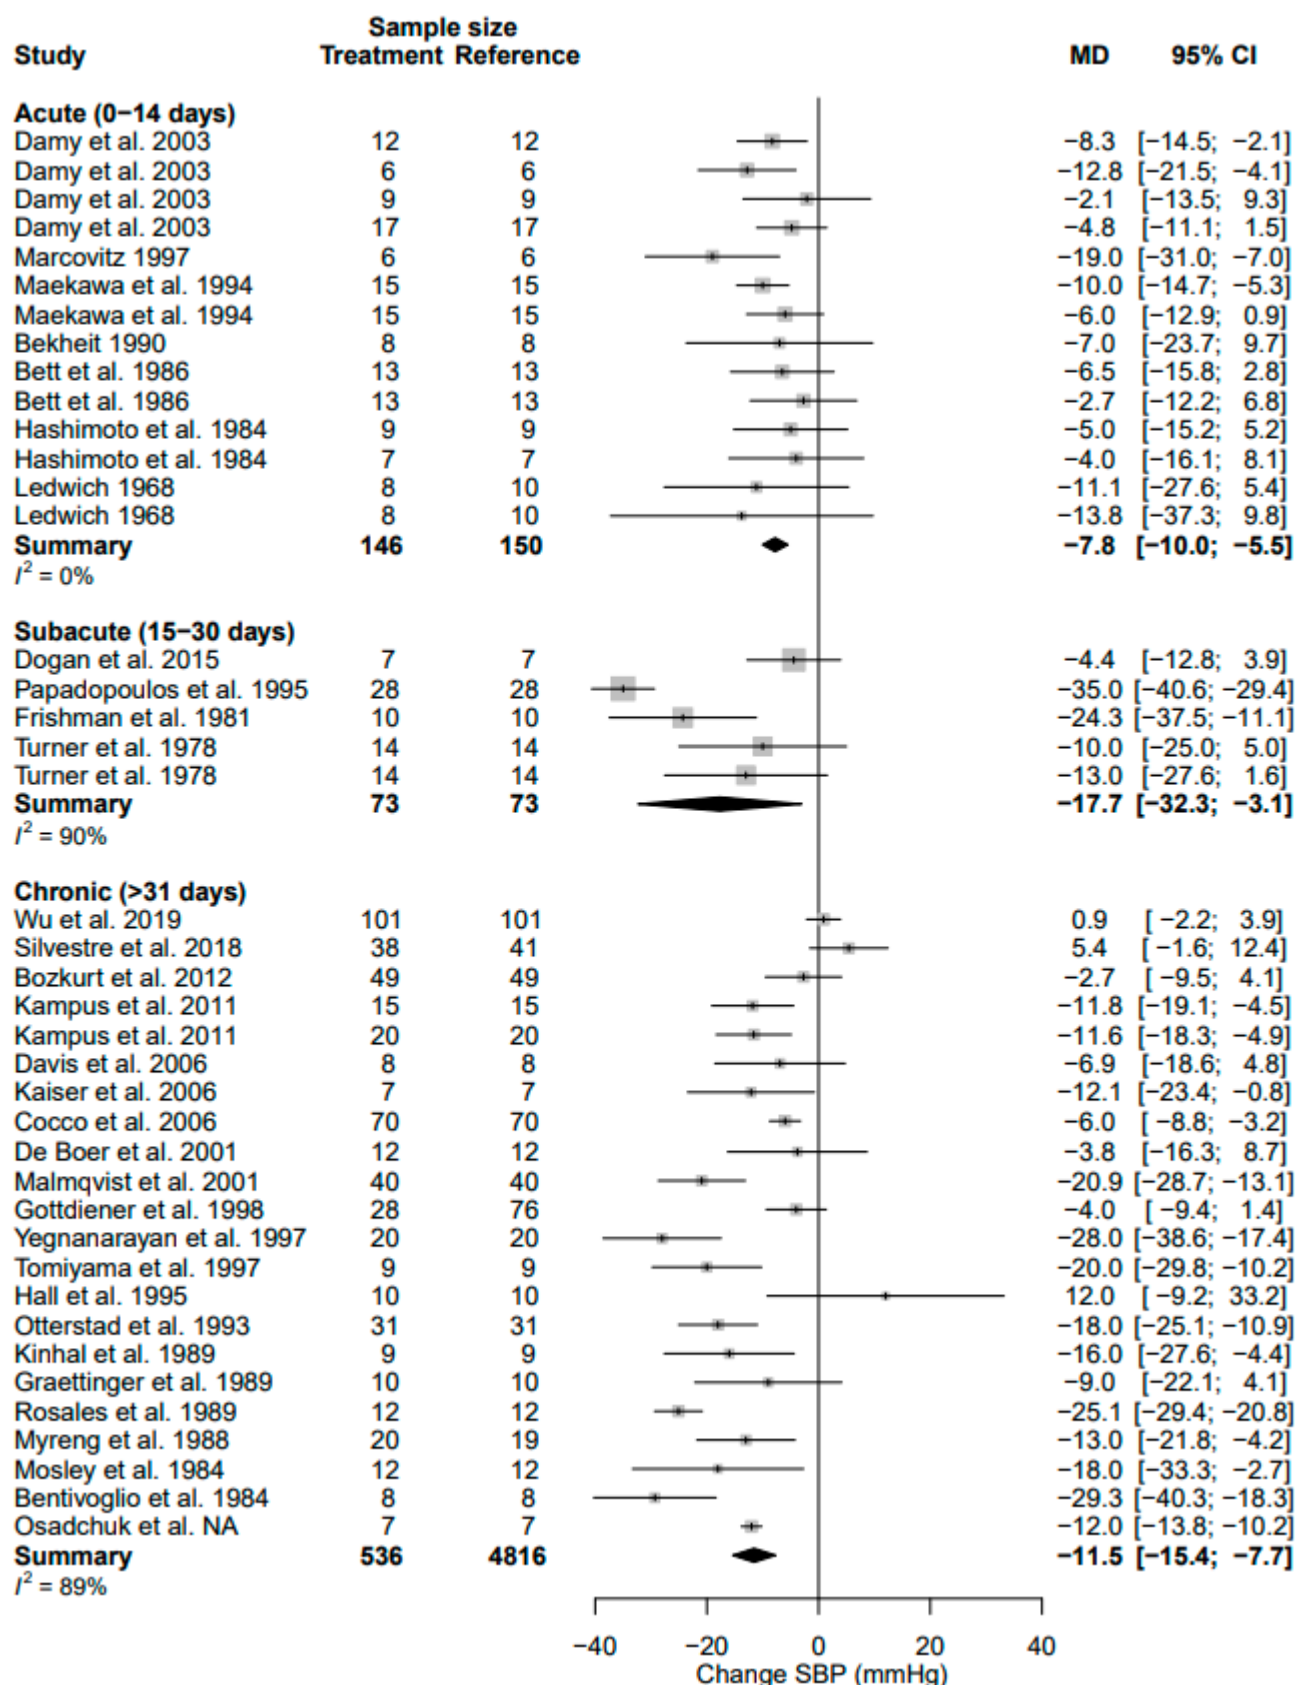

**Figure S2** Forest plot of systolic blood pressure (SBP) change in mmHg after acute, sub-acute and chronic beta-blocker use compared to baseline for males. MD = mean difference.

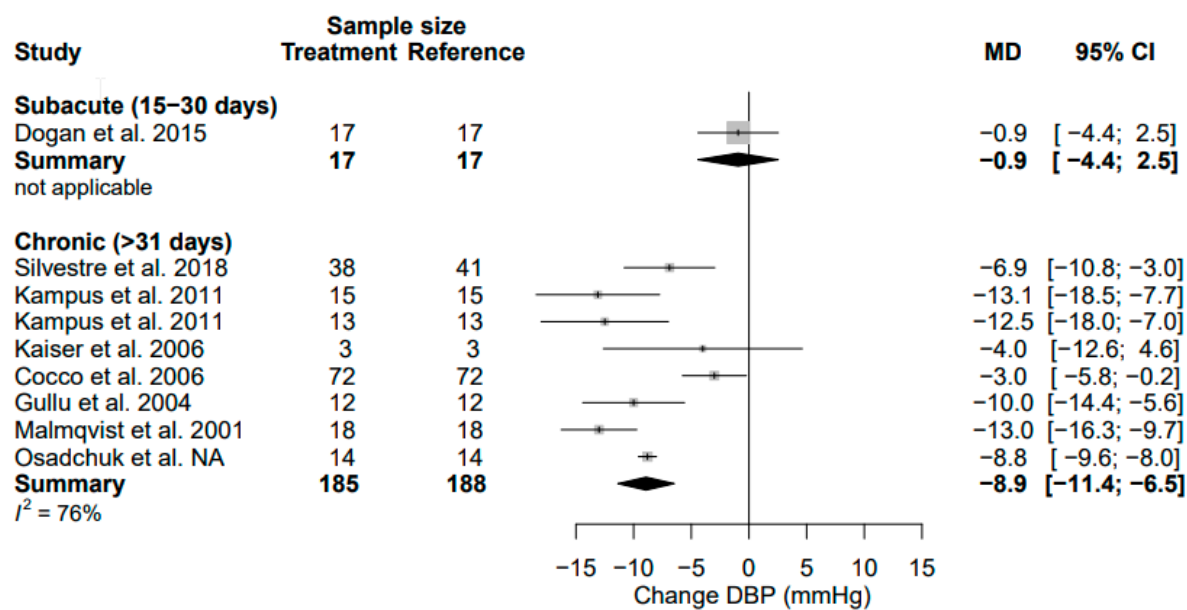

**Figure S3** Forest plot of diastolic blood pressure (DBP) change in mmHg after sub-acute and chronic beta-blocker use compared to baseline for females. MD = mean difference.

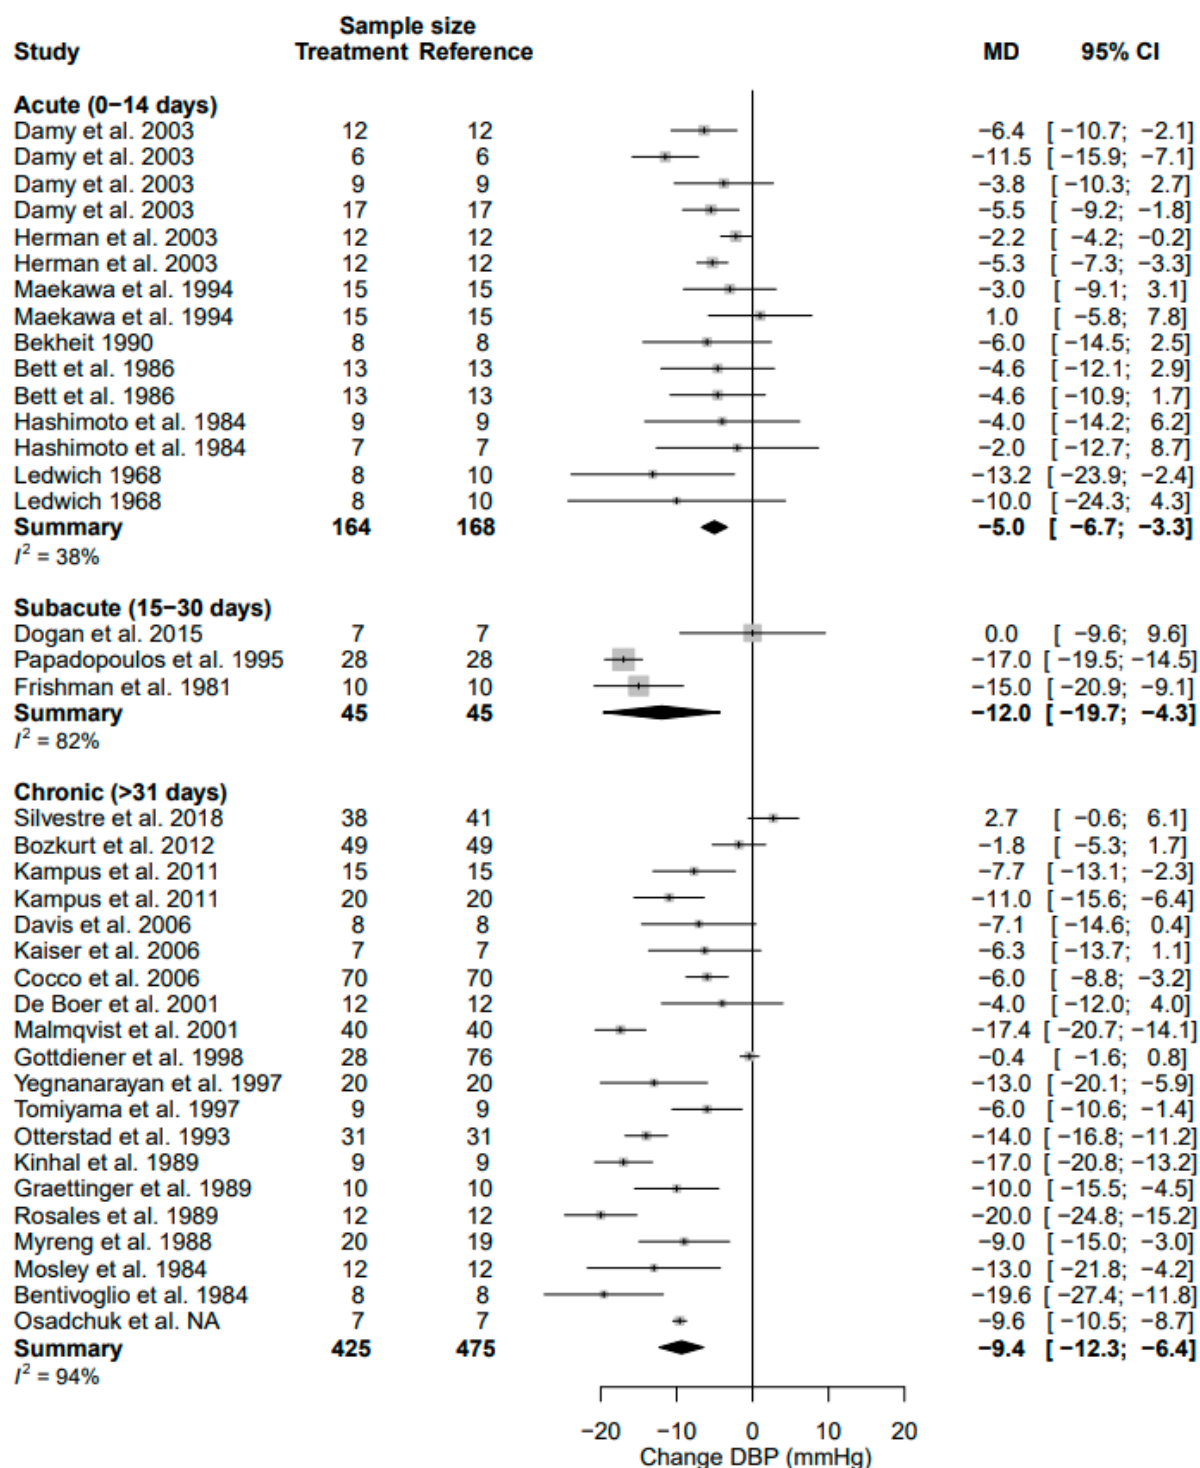

**Figure S4** Forest plot of diastolic blood pressure (DBP) change in mmHg after acute, sub-acute and chronic beta-blocker use compared to baseline for males. MD = mean difference.

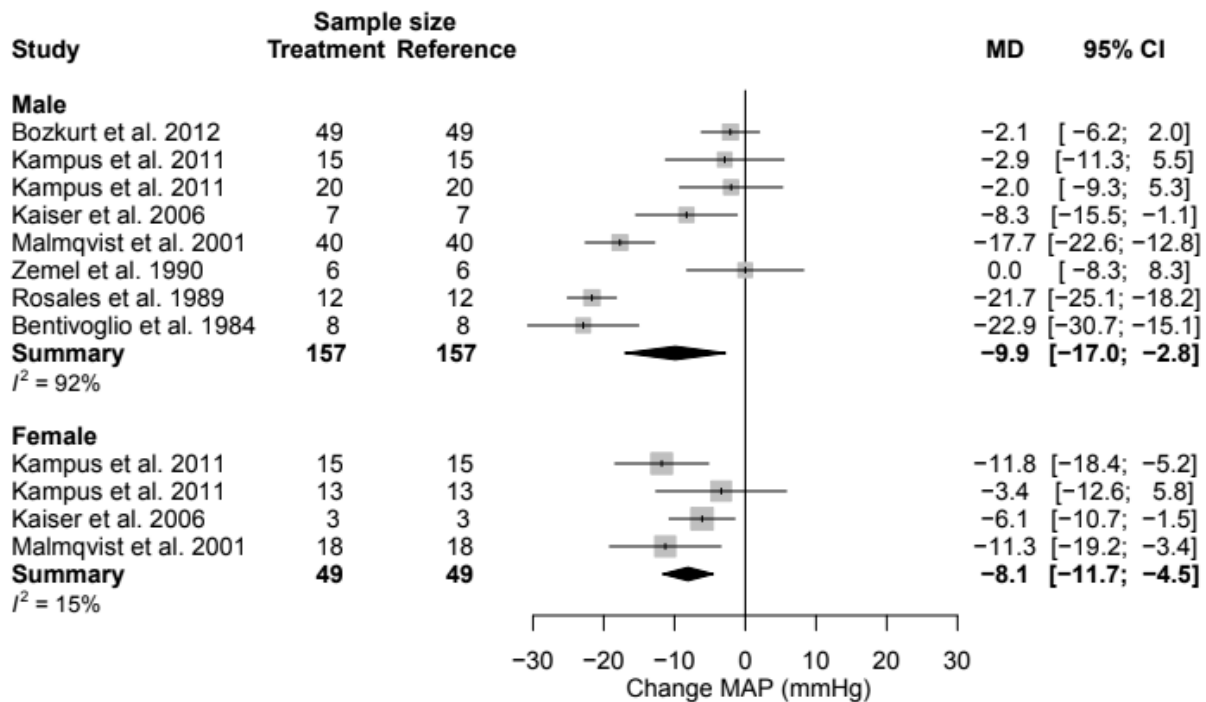

**Figure S5** Forest plot of mean arterial pressure (MAP) change in mmHg after beta-blocker use compared to baseline for females and males. MD = mean difference.

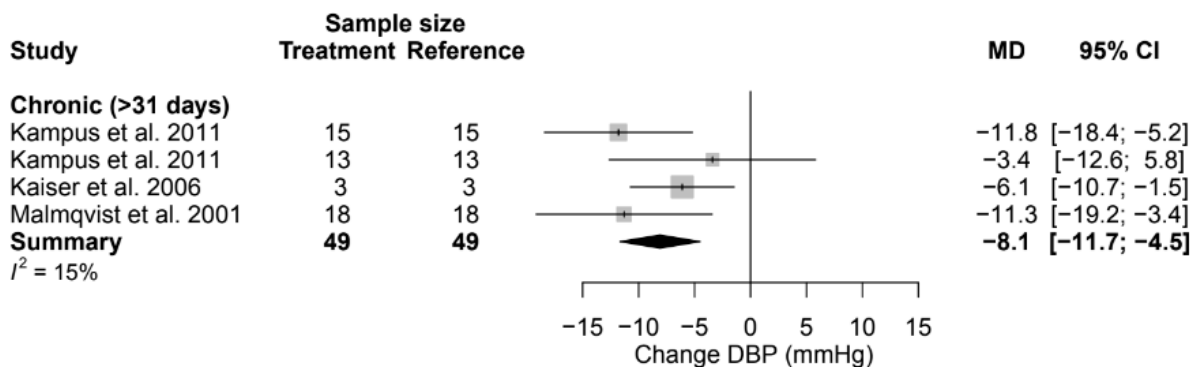

**Figure S6** Forest plot of mean arterial pressure (MAP) change in mmHg after acute, sub-acute and chronic beta-blocker use compared to baseline for females. MD = mean difference.

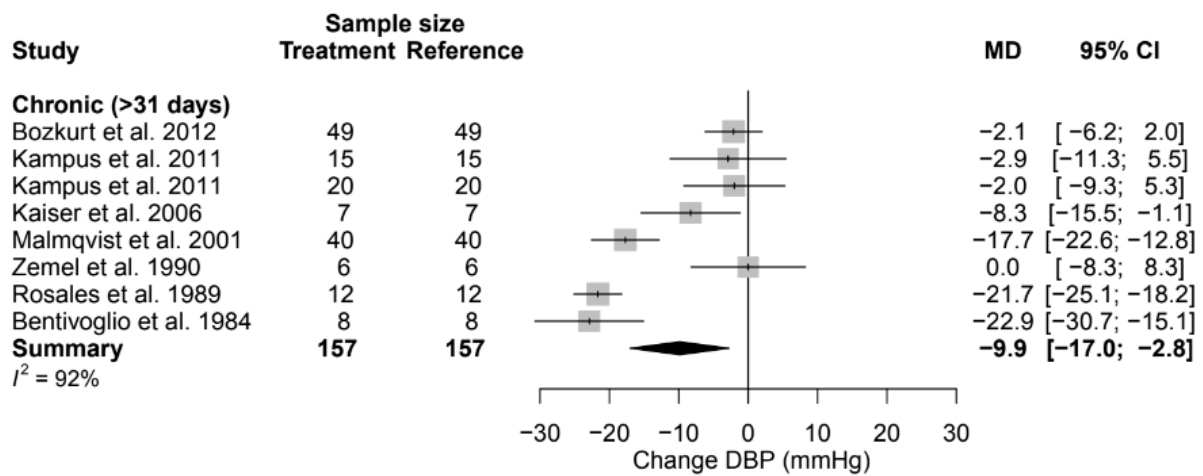

**Figure S7** Forest plot of mean arterial pressure (MAP) change in mmHg after acute, sub-acute and chronic beta-blocker use compared to baseline for males. MD = mean difference.



| Study                    | Sample size<br>Treatment | Sample size<br>Reference | MD           | 95% CI               |
|--------------------------|--------------------------|--------------------------|--------------|----------------------|
| <b>Female</b>            |                          |                          |              |                      |
| Wu et al. 2019           | 53                       | 53                       | -16.5        | [-18.6; -14.4]       |
| Silvestre et al. 2018    | 38                       | 41                       | -8.9         | [-14.8; -3.0]        |
| Dogan et al. 2015        | 17                       | 17                       | -11.8        | [-16.5; -7.1]        |
| Yeoh et al. 2011         | 7                        | 7                        | -6.8         | [-15.6; 1.9]         |
| Kampus et al. 2011       | 15                       | 15                       | -3.7         | [-9.3; 1.9]          |
| Kampus et al. 2011       | 13                       | 13                       | -8.3         | [-15.6; -1.0]        |
| Ito et al. 2009          | 12                       | 12                       | -13.7        | [-25.8; -1.7]        |
| Cocco et al. 2006        | 72                       | 72                       | -4.0         | [-6.8; -1.2]         |
| Kaiser et al. 2006       | 3                        | 3                        | -2.7         | [-6.9; 1.5]          |
| Taniguchi et al. 2003    | 2                        | 2                        | -32.5        | [-34.0; -31.0]       |
| Malmqvist et al. 2001    | 18                       | 18                       | -9.4         | [-15.7; -3.1]        |
| Osadchuk et al. NA       | 14                       | 14                       | -10.4        | [-11.3; -9.5]        |
| <b>Summary</b>           | <b>264</b>               | <b>267</b>               | <b>-10.8</b> | <b>[-17.4; -4.2]</b> |
| $I^2 = 98\%$             |                          |                          |              |                      |
| <b>Male</b>              |                          |                          |              |                      |
| Wu et al. 2019           | 101                      | 101                      | -18.6        | [-20.0; -17.2]       |
| Silvestre et al. 2018    | 38                       | 41                       | -7.8         | [-11.2; -4.4]        |
| Dogan et al. 2015        | 7                        | 7                        | -11.1        | [-20.0; -2.3]        |
| Bozkurt et al. 2012      | 49                       | 49                       | -12.8        | [-17.1; -8.5]        |
| Yeoh et al. 2011         | 9                        | 9                        | -3.2         | [-13.2; 6.7]         |
| Kampus et al. 2011       | 15                       | 15                       | -8.6         | [-14.5; -2.7]        |
| Kampus et al. 2011       | 20                       | 20                       | -3.5         | [-9.0; 2.0]          |
| Ito et al. 2009          | 7                        | 7                        | -6.4         | [-22.9; 10.0]        |
| Davis et al. 2006        | 8                        | 8                        | -13.1        | [-20.2; -6.0]        |
| Cocco et al. 2006        | 70                       | 70                       | -18.0        | [-20.8; -15.2]       |
| Kaiser et al. 2006       | 7                        | 7                        | -3.2         | [-13.0; 6.6]         |
| Damy et al. 2003         | 12                       | 12                       | -11.3        | [-17.3; -5.3]        |
| Damy et al. 2003         | 6                        | 6                        | -9.5         | [-19.2; 0.2]         |
| Damy et al. 2003         | 9                        | 9                        | -9.1         | [-13.7; -4.5]        |
| Damy et al. 2003         | 17                       | 17                       | -7.7         | [-11.1; -4.3]        |
| Herman et al. 2003       | 12                       | 12                       | -6.8         | [-8.9; -4.7]         |
| Herman et al. 2003       | 12                       | 12                       | -14.8        | [-16.8; -12.8]       |
| Taniguchi et al. 2003    | 4                        | 4                        | -8.8         | [-28.6; 11.1]        |
| Taniguchi et al. 2003    | 3                        | 3                        | -27.7        | [-39.3; -16.0]       |
| Taniguchi et al. 2003    | 1                        | 1                        | -46.0        |                      |
| Taniguchi et al. 2003    | 1                        | 1                        | -11.0        |                      |
| Taniguchi et al. 2003    | 1                        | 1                        | -14.0        |                      |
| Ridha et al. 2002        | 15                       | 15                       | -16.0        | [-22.9; -9.1]        |
| Bennett et al. 2002      | 12                       | 12                       | -17.0        | [-24.6; -9.4]        |
| De Boer et al. 2001      | 12                       | 12                       | -13.1        | [-22.3; -3.9]        |
| Kaye et al. 2001         | 10                       | 10                       | -16.0        | [-30.1; -1.9]        |
| Malmqvist et al. 2001    | 40                       | 40                       | -7.4         | [-11.1; -3.7]        |
| Gottdiener et al. 1998   | 28                       | 76                       | -1.5         | [-7.0; 4.0]          |
| Marcovitz et al. 1997    | 6                        | 6                        | -16.0        | [-23.4; -8.6]        |
| Silke et al. 1997        | 9                        | 9                        | -1.4         | [-7.6; 4.8]          |
| Silke et al. 1997        | 9                        | 9                        | 2.5          | [-4.9; 9.9]          |
| Papadopoulos et al. 1995 | 28                       | 28                       | -11.0        | [-14.9; -7.1]        |
| Hall et al. 1995         | 14                       | 14                       | -13.0        | [-22.6; -3.4]        |
| Heesch et al. 1995       | 15                       | 15                       | -9.0         | [-20.6; 2.6]         |
| Heesch et al. 1995       | 15                       | 15                       | -15.0        | [-27.2; -2.8]        |
| Maekawa et al. 1994      | 15                       | 15                       | -2.0         | [-7.2; 3.2]          |
| Maekawa et al. 1994      | 15                       | 15                       | -8.0         | [-12.7; -3.3]        |
| Ishida et al. 1993       | 6                        | 9                        | 1.8          | [-7.4; 11.0]         |
| Otterstad et al. 1993    | 31                       | 31                       | -12.0        | [-17.5; -6.5]        |
| Kyriakides et al. 1992   | 28                       | 28                       | -9.0         | [-14.6; -3.4]        |
| Bekheit 1990             | 8                        | 8                        | -19.4        | [-37.6; -1.2]        |
| Brune et al. 1990        | 10                       | 10                       | -14.0        | [-23.0; -5.0]        |
| Todd et al. 1990         | 20                       | 20                       | -17.0        | [-23.3; -10.7]       |
| Eichhorn et al. 1990     | 15                       | 15                       | -9.0         | [-20.6; 2.6]         |
| Kronenberg et al. 1990   | 10                       | 10                       | -11.0        | [-25.1; 3.1]         |
| Kinhal et al. 1989       | 9                        | 9                        | -15.0        | [-21.0; -9.0]        |
| Graettinger et al. 1989  | 10                       | 10                       | -5.0         | [-9.4; -0.6]         |
| Myreng et al. 1988       | 20                       | 20                       | -15.0        | [-20.9; -9.1]        |

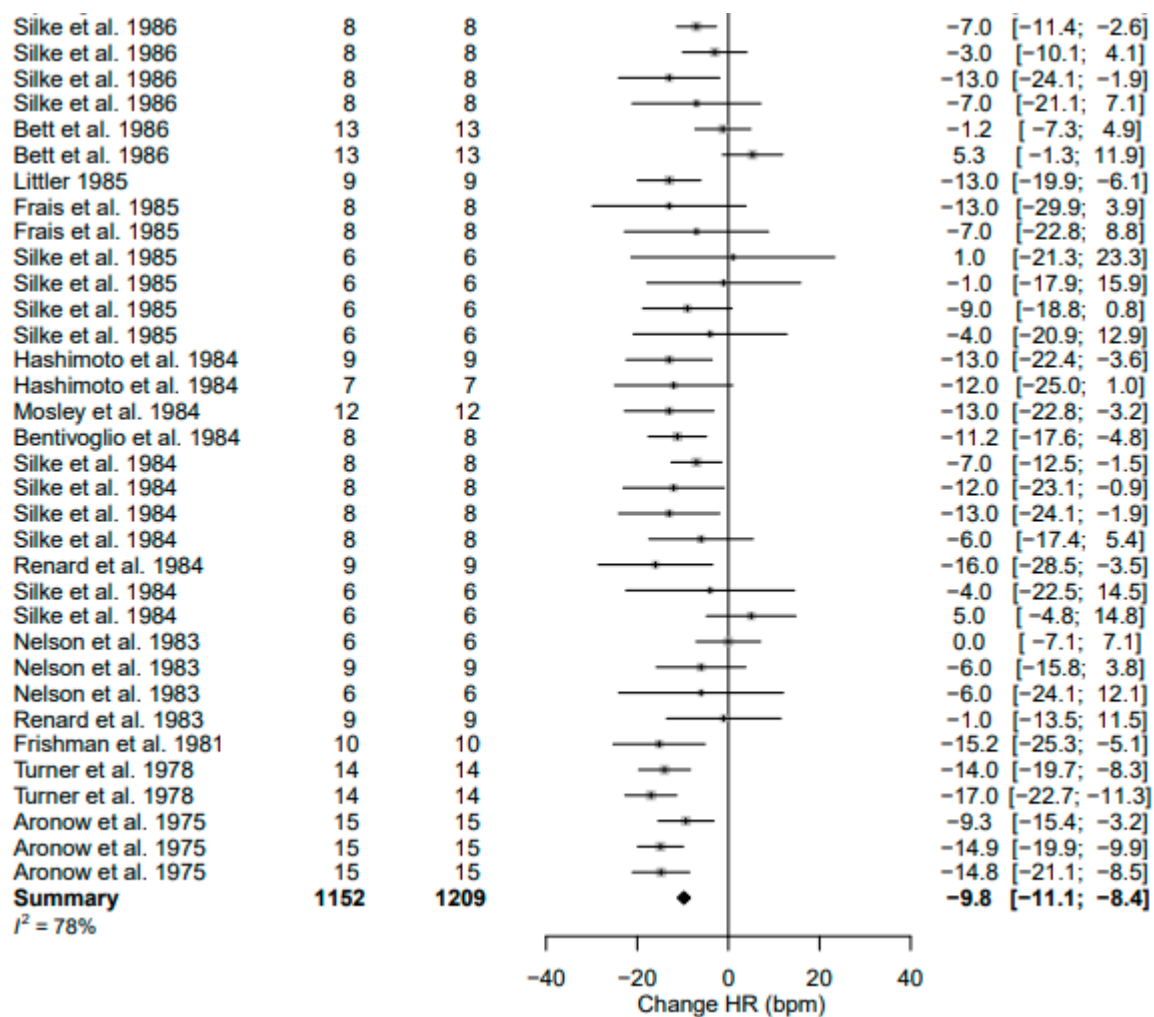

**Figure S8** Forest plot of heart rate (HR) change in beats per minute (bpm) after beta-blocker use compared to baseline for females and males. MD = mean difference.

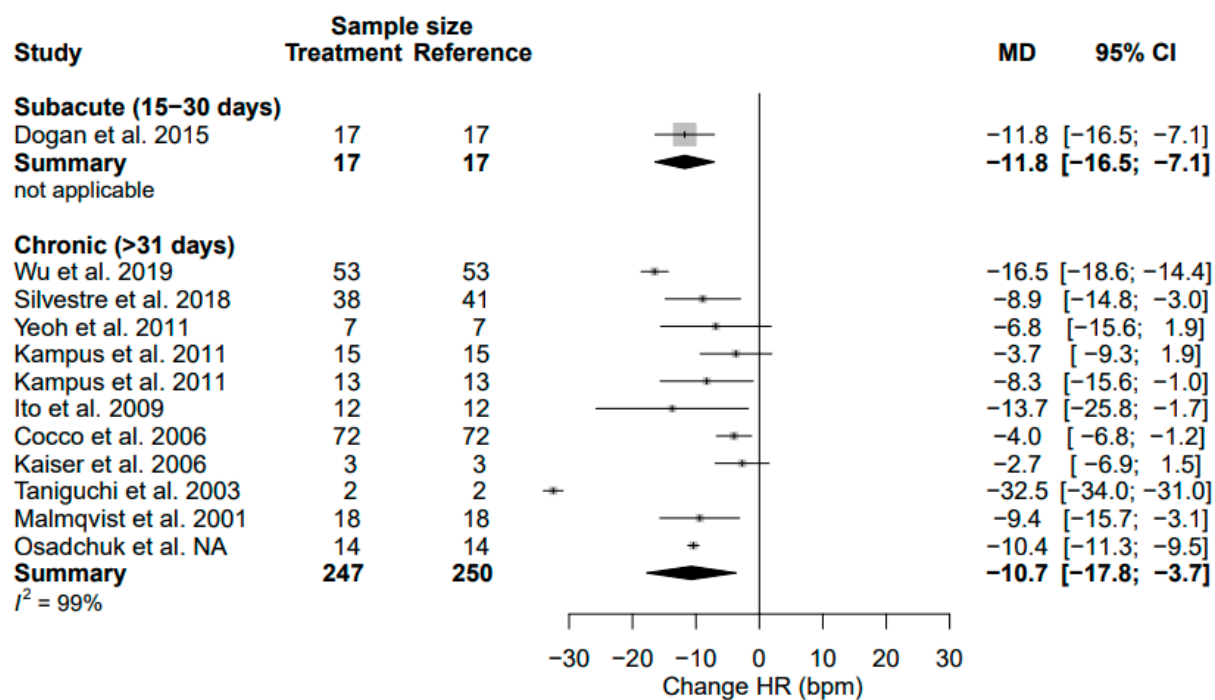

**Figure S9** Forest plot of heart rate (HR) change in beats per minute (bpm) after sub-acute and chronic be-ta-blocker use compared to baseline for females. MD = mean difference.

| Study                        | Sample size |            |  | MD           | 95% CI                |
|------------------------------|-------------|------------|--|--------------|-----------------------|
|                              | Treatment   | Reference  |  |              |                       |
| <b>Acute (0–14 days)</b>     |             |            |  |              |                       |
| Damy et al. 2003             | 12          | 12         |  | -11.3        | [-17.3; -5.3]         |
| Damy et al. 2003             | 6           | 6          |  | -9.5         | [-19.2; 0.2]          |
| Damy et al. 2003             | 9           | 9          |  | -9.1         | [-13.7; -4.5]         |
| Damy et al. 2003             | 17          | 17         |  | -7.7         | [-11.1; -4.3]         |
| Herman et al. 2003           | 12          | 12         |  | -6.8         | [-8.9; -4.7]          |
| Herman et al. 2003           | 12          | 12         |  | -14.8        | [-16.8; -12.8]        |
| Marcovitz et al. 1997        | 6           | 6          |  | -16.0        | [-23.4; -8.6]         |
| Silke et al. 1997            | 9           | 9          |  | -1.4         | [-7.6; 4.8]           |
| Silke et al. 1997            | 9           | 9          |  | 2.5          | [-4.9; 9.9]           |
| Maekawa et al. 1994          | 15          | 15         |  | -2.0         | [-7.2; 3.2]           |
| Maekawa et al. 1994          | 15          | 15         |  | -8.0         | [-12.7; -3.3]         |
| Kyriakides et al. 1992       | 28          | 28         |  | -9.0         | [-14.6; -3.4]         |
| Bekheit 1990                 | 8           | 8          |  | -19.4        | [-37.6; -1.2]         |
| Brune et al. 1990            | 10          | 10         |  | -14.0        | [-23.0; -5.0]         |
| Todd et al. 1990             | 20          | 20         |  | -17.0        | [-23.3; -10.7]        |
| Kronenberg et al. 1990       | 10          | 10         |  | -11.0        | [-25.1; 3.1]          |
| Silke et al. 1986            | 8           | 8          |  | -7.0         | [-11.4; -2.6]         |
| Silke et al. 1986            | 8           | 8          |  | -3.0         | [-10.1; 4.1]          |
| Silke et al. 1986            | 8           | 8          |  | -13.0        | [-24.1; -1.9]         |
| Silke et al. 1986            | 8           | 8          |  | -7.0         | [-21.1; 7.1]          |
| Bett et al. 1986             | 13          | 13         |  | -1.2         | [-7.3; 4.9]           |
| Bett et al. 1986             | 13          | 13         |  | 5.3          | [-1.3; 11.9]          |
| Frais et al. 1985            | 8           | 8          |  | -13.0        | [-29.9; 3.9]          |
| Frais et al. 1985            | 8           | 8          |  | -7.0         | [-22.8; 8.8]          |
| Silke et al. 1985            | 6           | 6          |  | 1.0          | [-21.3; 23.3]         |
| Silke et al. 1985            | 6           | 6          |  | -1.0         | [-17.9; 15.9]         |
| Silke et al. 1985            | 6           | 6          |  | -9.0         | [-18.8; 0.8]          |
| Silke et al. 1985            | 6           | 6          |  | -4.0         | [-20.9; 12.9]         |
| Hashimoto et al. 1984        | 9           | 9          |  | -13.0        | [-22.4; -3.6]         |
| Hashimoto et al. 1984        | 7           | 7          |  | -12.0        | [-25.0; 1.0]          |
| Silke et al. 1984            | 8           | 8          |  | -7.0         | [-12.5; -1.5]         |
| Silke et al. 1984            | 8           | 8          |  | -12.0        | [-23.1; -0.9]         |
| Silke et al. 1984            | 8           | 8          |  | -13.0        | [-24.1; -1.9]         |
| Silke et al. 1984            | 8           | 8          |  | -6.0         | [-17.4; 5.4]          |
| Renard et al. 1984           | 9           | 9          |  | -16.0        | [-28.5; -3.5]         |
| Silke et al. 1984            | 6           | 6          |  | -4.0         | [-22.5; 14.5]         |
| Silke et al. 1984            | 6           | 6          |  | 5.0          | [-4.8; 14.8]          |
| Nelson et al. 1983           | 6           | 6          |  | 0.0          | [-7.1; 7.1]           |
| Nelson et al. 1983           | 9           | 9          |  | -6.0         | [-15.8; 3.8]          |
| Nelson et al. 1983           | 6           | 6          |  | -6.0         | [-24.1; 12.1]         |
| Renard et al. 1983           | 9           | 9          |  | -1.0         | [-13.5; 11.5]         |
| Aronow et al. 1975           | 15          | 15         |  | -9.3         | [-15.4; -3.2]         |
| Aronow et al. 1975           | 15          | 15         |  | -14.9        | [-19.9; -9.9]         |
| Aronow et al. 1975           | 15          | 15         |  | -14.8        | [-21.1; -8.5]         |
| Ledwich 1968                 | 9           | 10         |  | -14.3        | [-30.4; 1.9]          |
| Ledwich 1968                 | 8           | 10         |  | -30.1        | [-44.3; -15.9]        |
| <b>Summary</b>               | <b>457</b>  | <b>460</b> |  | <b>-8.2</b>  | <b>[-10.1; -6.4]</b>  |
| $I^2 = 68\%$                 |             |            |  |              |                       |
| <b>Subacute (15–30 days)</b> |             |            |  |              |                       |
| Dogan et al. 2015            | 7           | 7          |  | -11.1        | [-20.0; -2.3]         |
| Papadopoulos et al. 1995     | 28          | 28         |  | -11.0        | [-14.9; -7.1]         |
| Frishman et al. 1981         | 10          | 10         |  | -15.2        | [-25.3; -5.1]         |
| Turner et al. 1978           | 14          | 14         |  | -14.0        | [-19.7; -8.3]         |
| Turner et al. 1978           | 14          | 14         |  | -17.0        | [-22.7; -11.3]        |
| <b>Summary</b>               | <b>73</b>   | <b>73</b>  |  | <b>-13.1</b> | <b>[-15.7; -10.6]</b> |
| $I^2 = 0\%$                  |             |            |  |              |                       |

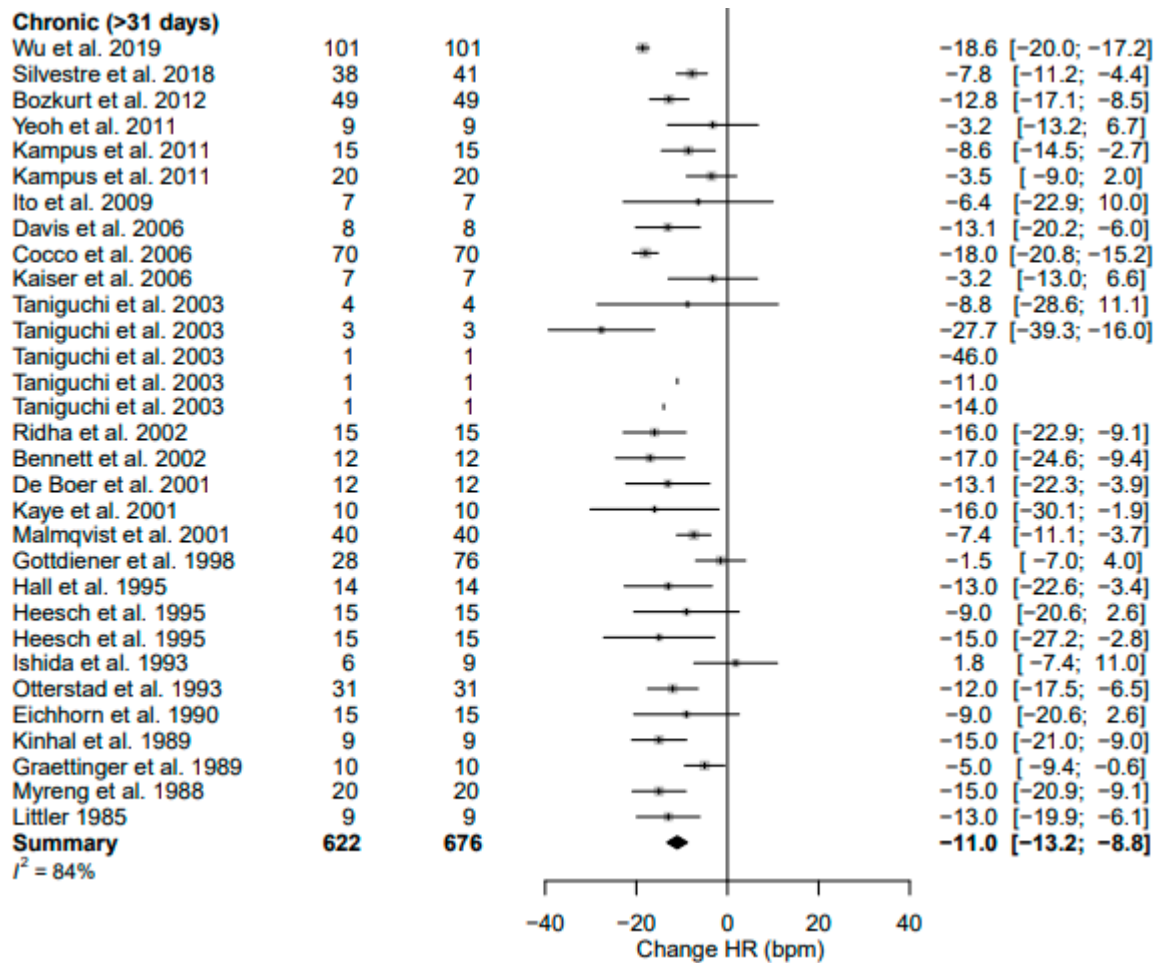

**Figure S10** Forest plot of heart rate (HR) change in beat per minute (bpm) after acute, sub-acute and chronic beta-blocker use compared to baseline for males. MD = mean difference.

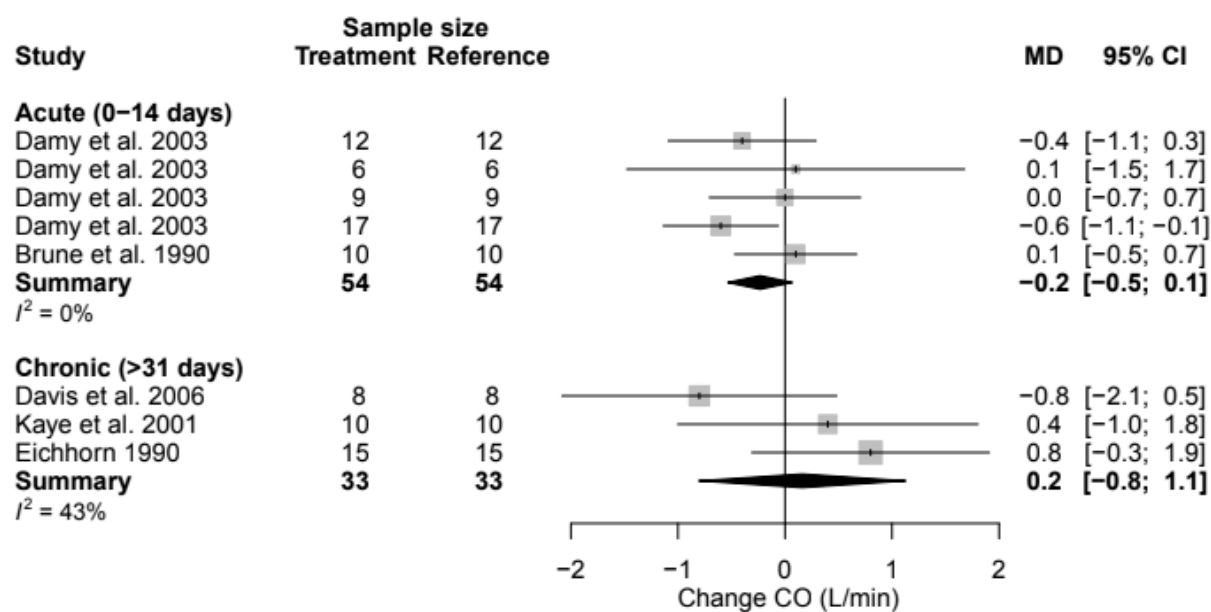

**Figure S11** Forest plot of cardiac output (CO) change in liter per minute (L/min) after acute and chronic be-ta-blocker use compared to baseline for males. MD = mean difference.

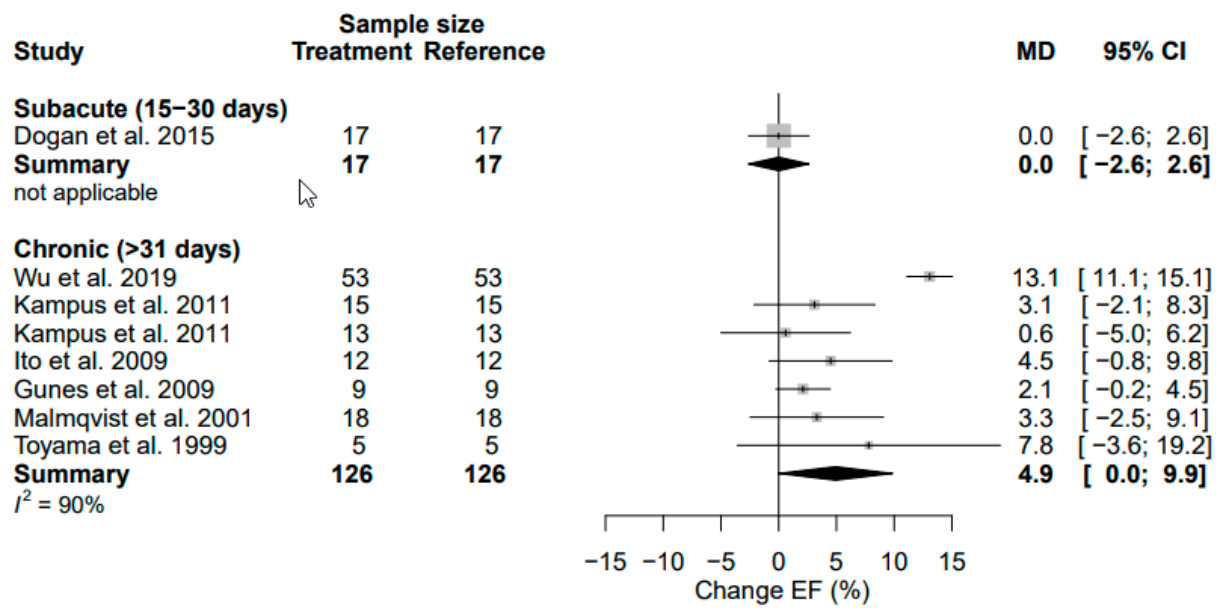

**Figure S12** Forest plot of left ventricular ejection fraction (LVEF) change in % after sub-acute and chronic be-ta-blocker use compared to baseline for females. MD = mean difference.



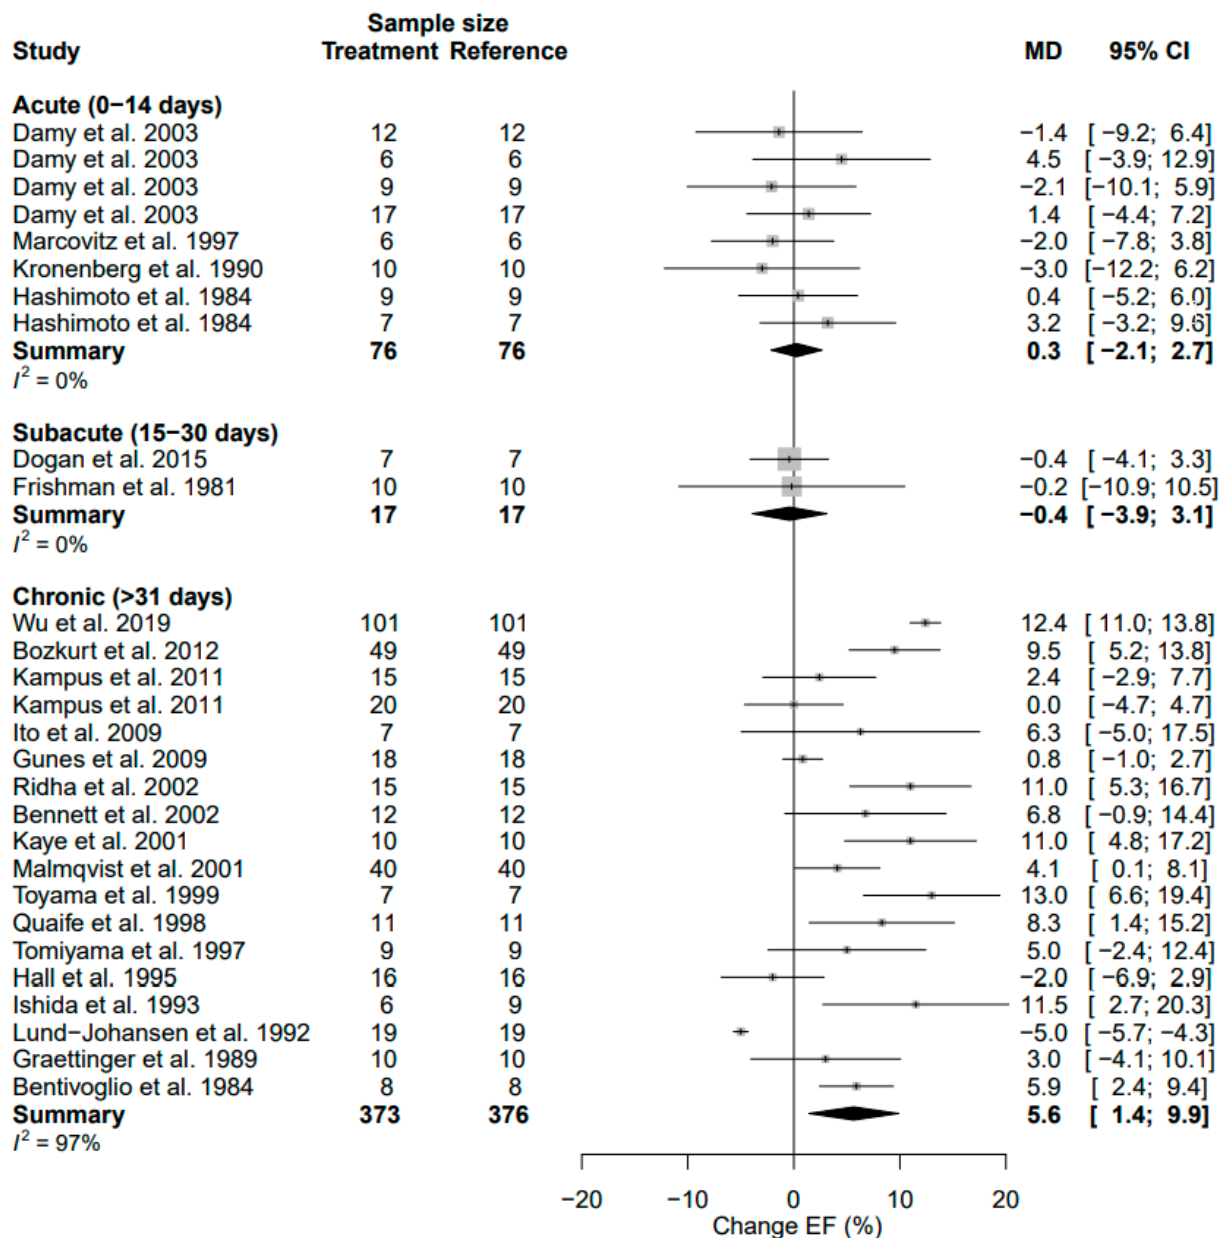

**Figure S13** Forest plot of left ventricular ejection fraction (LVEF) change in % after acute, sub-acute and chronic beta-blocker use compared to baseline for males. MD = mean difference.



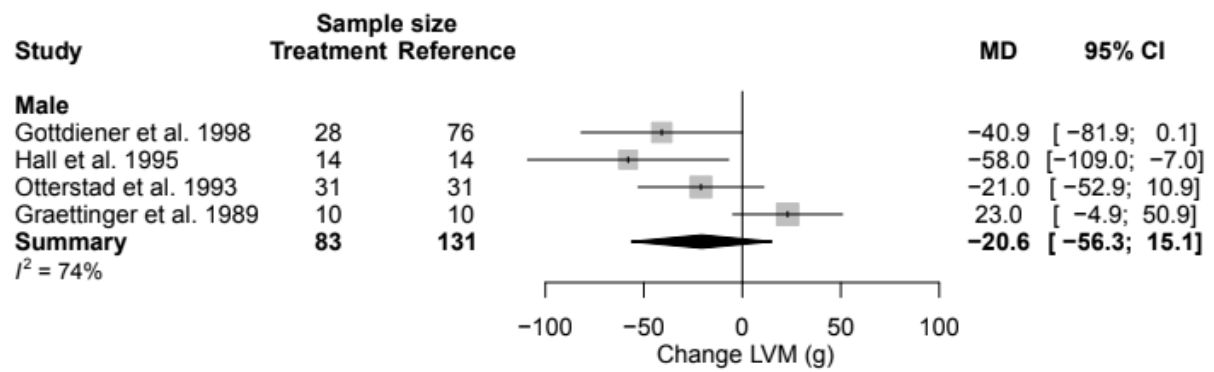

**Figure S14** Forest plot of left ventricular mass (LVM) change in grams after beta-blocker use compared to baseline for females and males. MD = mean difference.
